# Supplementary material for: Writing Modern Ireland: Literary Representations of a Society in flux/Ecrire l'Irlande Moderne: Representations Litteraires D'une Societe En Voie De Changement
Source: PeerJ journal article supplement (doi:10.7717/peerj.13277), 2012-01-01
Supplement: COVID_Supplemental_Figure_S1.pdf [file COVID_Supplemental_Figure_S1.pdf]

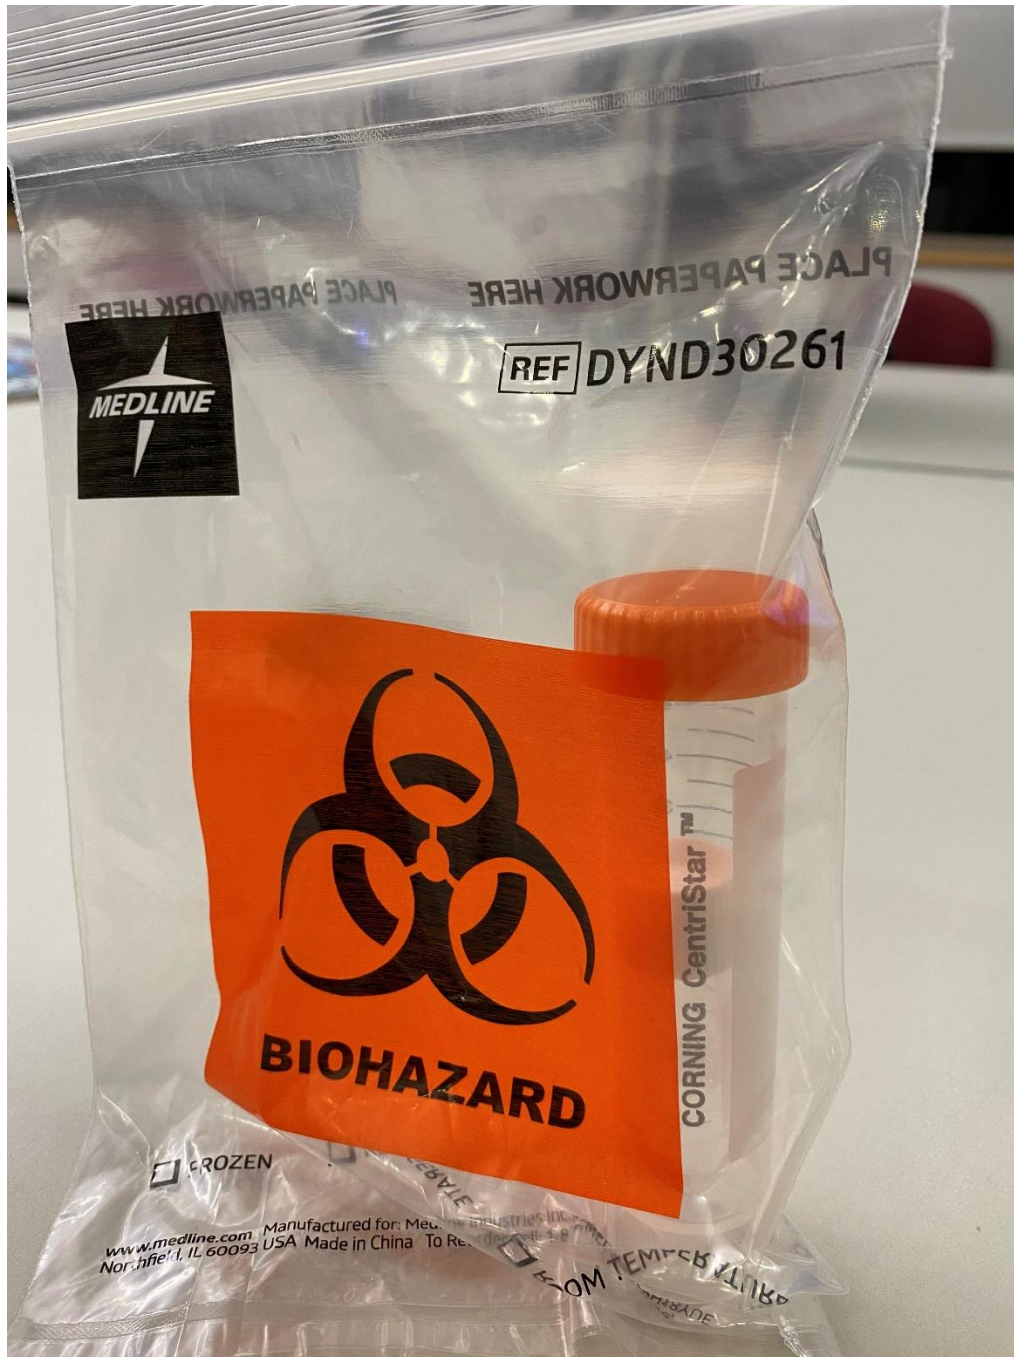

Supplemental Figure 1: Picture of the Two-Step Kit container. In the picture is a sample collection tube (a 50 mL self-standing centrifuge tube with an orange cap) and a smaller tube (5 mL self-standing tube with a white cap). The smaller tube contains a virus-inactivating and RNase-inhibiting solution. The sample collection tube is in a sealable biohazard plastic bag.
