# Supplementary material for: Writing Modern Ireland: Literary Representations of a Society in flux/Ecrire l'Irlande Moderne: Representations Litteraires D'une Societe En Voie De Changement
Source: PeerJ journal article supplement (doi:10.7717/peerj.13277), 2012-01-01
Supplement: COVID_Supplemental_Figure_S2.pdf [file COVID_Supplemental_Figure_S2.pdf]

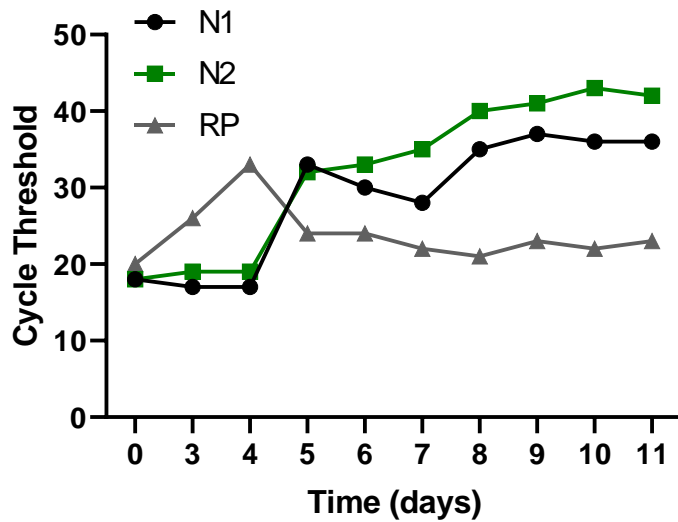

Supplemental Figure 2: Cycle threshold of serial saliva samples collected over time from a positive COVID-19 individual.

RNA isolated from saliva collected via the PSCS-CoV2 method. RNA was amplified for RP, N1, and N2. Day 0 was the first collection from a confirmed positive COVID-19 individual. Saliva samples were serially collected at day 3, 4, 5, 6, 7, 8, 9, 10 and 11. Cycle threshold for N1 and N2 generally increased over time while the cycle threshold for RP stayed relatively constant.
