# Supplementary material for: An open source and convenient method for the wide-spread testing of COVID-19 using deep throat sputum samples
Source: PeerJ. 2022 May 10;10:e13277. doi: 10.7717/peerj.13277 (PMC9104087; doi:10.7717/peerj.13277)
Supplement: Supplemental Information 4 [file peerj-10-13277-s004.xlsx]

## Sheet: Table 1 and Supp Table 1
	Results obtained from parallel testing of COVID positve samples tested with an independent CLIA Laboratory and our PSCS-CoV2 method
	NP Swab Ct			NOF Ct			NOF Interpretation	% Agreement
Patient ID	N1	N2	RP	N1	E	RP
P001	<40			28.7	28.2	24.6	Positive	1
P002	<40			25.3	26.6	21.2	Positive	1
P003	<40			32.2	31	21.2	Positive	1
P004	<40			19.1	20.3	24	Positive	1
P005	<40			19.4	25.2	20.4	Positive	1
P006	<40			26.8	27.4	21.8	Positive	1
P007	<40			31.5	30.4	21.2	Positive	1
P008	<40			24.2	26.8	22.2	Positive	1
P009	<40			33.9	32.2	18.1	Positive	1
P010	<40			20.2	21.2	19.3	Positive	1
P011	<40			23.1	24.6	19.8	Positive	1
P012	<40			28.1	27.1	22	Positive	1
P013	<40			22.9	26.1	20.5	Positive	1
P014	<40			31.3	30.3	22.6	Positive	1
P015	<40			29	28	21.4	Positive	1
P016	<40			32.3	31.8	22.3	Positive	1
P017	<40			26.7	27.7	20.7	Positive	1
P018	<40			20.5	21.1	20.1	Positive	1
P019	<40			15.3	15.2	19	Positive	1
P020	<40			24.3	22.9	22.4	Positive	1
P021	<40			17.4	18.3	23.3	Positive	1
P022	<40			25.2	25.6	24	Positive	1
P023	<40			20.1	18.8	22	Positive	1
P024	<40			30.7	25.9	25.3	Positive	1
P025	<40			34.2	34.6	22.3	Positive	1
P026	<40			25.6	24.5	23.9	Positive	1
P027	<40			32.2	28.2	25.8	Positive	1
P028	<40			19.7	19.2	24.4	Positive	1
P029	<40			18.8	17.9	22.8	Positive	1
P030	<40			17.7	17.2	24.3	Positive	1
P031	<40			24.6	23	23.1	Positive	1
P032	<40			24.3	24.3	24.9	Positive	1
P033	<40			27	36.2	29.4	Positive	1
P034	<40			26.9	26.3	23.8	Positive	1
P035	<40			23.1	23.1	23	Positive	1
P036	<40			22.8	22.8	25.1	Positive	1
P037	<40			23.7	23.6	23.4	Positive	1
P038	<40			15.2	16.4	21.5	Positive	1
P039	<40			29	30	24.4	Positive	1
P040	<40			22.1	22.1	22.7	Positive	1
P041	<40			27.2	26.7	23.2	Positive	1
P042	<40			34.9	34.8	23.5	Positive	1
average				25.1714	25.3238	22.6405
std dev				5.2636	5.09279	2.09378
	Results obtained from parallel testing of COVID negative samples tested with an independent CLIA Laboratory and our PSCS-CoV2 method
	NP Swab Ct			NOF Ct				NOF Interpretation	% Agreement
Patient ID	N1	N2	RP	N1	N2	E	RP
N001	n.d.	n.d.	25.3	n.d.	n.d.	n.d.	24.3	Negative	1
N002	n.d.	n.d.	25.1	n.d.	n.d.	n.d.	24.1	Negative	1
N003	n.d.	n.d.	26	n.d.	n.d.	n.d.	23.6	Negative	1
N004	n.d.	n.d.	25.2	n.d.	n.d.	n.d.	24	Negative	1
N005	n.d.	n.d.	22.3	n.d.	n.d.	n.d.	26.1	Negative	1
N006	n.d.	n.d.	22.6	n.d.	n.d.	n.d.	29.1	Negative	1
N007	n.d.	n.d.	21.6	n.d.	n.d.	n.d.	19.6	Negative	1
N008	n.d.	n.d.	22.8	n.d.	n.d.	n.d.	19.3	Negative	1
N009	n.d.	n.d.	21.4	n.d.	n.d.	n.d.	25.9	Negative	1
N010	n.d.	n.d.	23	n.d.	n.d.	n.d.	24.6	Negative	1
N011	n.d.	n.d.	23.6	n.d.	n.d.	n.d.	25.3	Negative	1
N012	n.d.	n.d.	16.9	n.d.	n.d.	n.d.	18.6	Negative	1
N013	n.d.	n.d.	18.9	n.d.	n.d.	n.d.	18.2	Negative	1
N014	n.d.	n.d.	24.2	n.d.	n.d.	n.d.	20.6	Negative	1
N015	n.d.	n.d.	24.3	n.d.	n.d.	n.d.	22.1	Negative	1
N016	n.d.	n.d.	24.4	n.d.	n.d.	n.d.	21.6	Negative	1
N017	n.d.	n.d.	23.4	n.d.	n.d.	n.d.	20.4	Negative	1
N018	n.d.	n.d.	22.3	n.d.	n.d.	n.d.	20.3	Negative	1
N019	n.d.	n.d.	23.7	n.d.	n.d.	n.d.	24.6	Negative	1
N020	n.d.	n.d.	21.2	n.d.	n.d.	n.d.	24.8	Negative	1
N021	n.d.	n.d.	23.2	n.d.	n.d.	n.d.	21.3	Negative	1
N022	n.d.	n.d.	21.3	n.d.	n.d.	n.d.	18.5	Negative	1
N023	n.d.	n.d.	26.8	n.d.	n.d.	n.d.	21.4	Negative	1
N024	n.d.	n.d.	23.2	n.d.	n.d.	n.d.	20.5	Negative	1
N025	n.d.	n.d.	24.1	n.d.	n.d.	n.d.	20.7	Negative	1
N026	n.d.	n.d.	24.4	n.d.	n.d.	n.d.	25.9	Negative	1
N027	n.d.	n.d.	25	n.d.	n.d.	n.d.	25.9	Negative	1
N028	n.d.	n.d.	28.8	n.d.	n.d.	n.d.	22.1	Negative	1
N029	n.d.	n.d.	22.7	n.d.	n.d.	n.d.	20.6	Negative	1
N030	n.d.	n.d.	20.7	n.d.	n.d.	n.d.	23.9	Negative	1
average			23.28				22.5967
std dev			2.30328				2.75387
Patient Type (total cases)	Sample Type	Analysis	Target
			N1	N2	E	RP
Positive Cases (42)	NP Swab	Positives/Total	42/42	42/42	not tested	not tested
		Mean Ct ± SD	not given	not given	not tested	not tested
	NOF	Positives/Total	42/42	N/A	42/42	42/42
		Mean Ct ± SD	<40 (25.2 ± 5.3)	N/A	<40 (25.3 ± 5.1)	<34 (22.6 ± 2.1)
Negative Cases (30)	NP Swab	Positives/Total	0/30	0/30	not tested	30/30
		Mean Ct ± SD	n.d.	n.d.	not tested	<34 (23.3 ± 2.3)
	NOF	Positives/Total	0/30	0/30	0/30	30/30
		Mean Ct ± SD	n.d.	n.d.	n.d.	<34 (22.6 ± 2.8)

## Sheet: Table 2
Dilution of Positive RNA	Replicate	Ct Value			Positive/Total
		N1	E	RP
1	1	13.4	15.8	21.8	2021-03-03
	2	13.3	15.9	21.8
	3	13	16	21.9
	Mean Ct	13.2333	15.9	21.8333
	Std dev	0.208167	0.1	0.057735
2021-01-10	1	14.7	17.3	23.3	2021-03-03
	2	16	19.5	23.1
	3	14.3	17.6	23
	Mean Ct	15	18.1333	23.1333
	Std dev	0.888819	1.19304	0.152753
1/100	1	17.9	21.2	24.2	2021-03-03
	2	17.7	21.5	24
	3	17.6	20.9	24.4
	Mean Ct	17.7333	21.2	24.2
	Std dev	0.152753	0.3	0.2
1/10^3	1	21.9	25.2	25.2	2021-03-03
	2	20.9	23.8	24.7
	3	21.4	25.2	25.2
	Mean Ct	21.4	24.7333	25.0333
	Std dev	0.5	0.80829	0.288675
1/10^4	1	24.8	27.6	25	2021-03-03
	2	24.4	28.2	24.8
	3	24.3	27.8	24.4
	Mean Ct	24.5	27.8667	24.7333
	Std dev	0.264575	0.305505	0.305505
1/10^5	1	28.3	31.5	24.7	2021-03-03
	2	27.7	31	24.1
	3	28.2	30.8	24.4
	Mean Ct	28.0667	31.1	24.4
	Std dev	0.321455	0.360555	0.3
LoD Confirmation of 1/5000 Dilution (2X LoD)
Dilution of Positive Sample	Replicate	Ct Value			Positive/Total
		N1	E	RP
1/5000 (2X LoD)	1	24.2	27	26.9	20/20
	2	24	27.1	25.5
	3	23.7	26.6	24.7
	4	23.7	27.1	26.1
	5	23.5	26.8	25.1
	6	24.5	28.7	26.1
	7	23.6	26.8	25.1
	8	24.1	26.8	25.1
	9	23.9	26.8	25.4
	10	24.4	27.2	25.1
	11	25.6	29.3	26.5
	12	24	27.4	25.7
	13	26.8	26.6	25.6
	14	25.8	26.7	25.6
	15	23.8	26.9	25.8
	16	23.4	26.6	25.4
	17	24.5	28	25.7
	18	24.3	26.5	25.4
	19	23.3	27.5	25.4
	20	23.4	26.5	25.1
	Mean Ct	24.225	27.145	25.565
	Std dev	0.896704	0.742311	0.526433
Dilution of Positive Sample	Replicate	Ct Value			Positive/Total
		N1	E	RP
1	Mean Ct (SD)	13.2 (0.2)	15.9 (0.1)	21.8 (0.1)	2021-03-03
2021-01-10	Mean Ct (SD)	15 (0.9)	18.1 (1.2)	28.1 (0.2)	2021-03-03
1/100	Mean Ct (SD)	17.7 (0.2)	21.2 (0.3)	24.2 (0.2)	2021-03-03
1/10^3	Mean Ct (SD)	21.4 (0.5)	24.7 (0.8)	25 (0.3)	2021-03-03
1/10^4	Mean Ct (SD)	24.5 (0.3)	27.9 (0.3)	24.7 (0.3)	2021-03-03
1/10^5	Mean Ct (SD)	28.1 (0.3)	31.1 (0.4)	24.4 (0.3)	2021-03-03
1/5000 (2X LoD)	Mean Ct (SD)	24.2 (0.9)	27.1 (0.7)	25.6 (0.5)	20/20

## Sheet: Table 3
Table 8. Nasal/Oral Fluid (NOF) VIS Equivalency Study Positives
Concentration of Positive RNA in NOF	Replicate	No VIS Ct			VIS Ct			% Agreement
		N1	E	RP	N1	E	RP
2x LoD	1	29.2	29.7	22.6	28.7	29	23.7	1
	2	29.1	29.6	23	29.1	29.4	23.6	1
	3	29.1	29.4	23.2	28.9	29.3	23.6	1
	4	29.5	29.9	23	29.4	30.1	23.9	1
	5	29.2	30.1	22.5	28.7	29.6	23.5	1
	6	29.1	29.6	22.3	29.1	29.8	23.5	1
	7	28.1	28.3	22.2	22.7	25.4	23.1	1
	8	27.5	28	22.4	22.3	25.1	22.4	1
	9	25.9	26.8	22.5	22.9	25.3	22.8	1
	10	26.3	26.5	22.5	22.5	25.3	22.5	1
		28.3	28.79	22.62	26.43	27.83	23.26
		1.30894	1.31356	0.332666	3.3059	2.21913	0.527468
Table 9. Nasal/Oral Fluid (NOF) VIS Equivalency Study Negatives
Concentration of Positive RNA in NOF	Replicate	No VIS Ct			VIS Ct			% Agreement
		N1	E	RP	N1	E	RP
Negative (no viral RNA added)	1	n.d.	n.d.	22.7	n.d.	n.d.	24.3	1
	2	n.d.	n.d.	22.7	n.d.	n.d.	23.3	1
	3	n.d.	n.d.	22.7	n.d.	n.d.	23.4	1
	4	n.d.	n.d.	22.6	n.d.	n.d.	23.5	1
	5	n.d.	n.d.	22.3	n.d.	n.d.	24.1	1
	6	n.d.	n.d.	22.5	n.d.	n.d.	23.8	1
	7	n.d.	n.d.	22.2	n.d.	n.d.	23.2	1
	8	n.d.	n.d.	22.8	n.d.	n.d.	23.7	1
	9	n.d.	n.d.	22.4	n.d.	n.d.	23.1	1
	10	n.d.	n.d.	22.4	n.d.	n.d.	23.5	1
				22.53			23.59
				0.200278			0.387155
Concentration of Positive RNA in NOF	Replicates	No VIS: Mean Ct (SD)			VIS Ct: Mean Ct (SD)			% Agreement
		N1	E	RP	N1	E	RP
2x LoD	10	28.3 (1.3)	28.8 (1.3)	22.6 (0.3)	26.4 (3.3)	27.8 (2.2)	23.3 (0.5)	1
Negative (no viral RNA added)	10	n.d.	n.d.	22.5 (.2)	n.d.	n.d.	23.6 (0.4)	1

## Sheet: Table 4, 5, 6
Table 12. Stability of 2x LoD samples at 40°C for 56 hours
Concentration	Replicate	Ct Value			NOF Interpretation
		N1	E	RP
2x LoD	1	20.7	23.5	26.3	Positive
	2	20.7	23.5	25.9	Positive
	3	20.6	23.5	26.1	Positive
	4	20.3	23.4	26.1	Positive
	5	20.5	23.6	25.8	Positive
	6	20.4	23.4	25.8	Positive
	7	20.1	23.3	25.5	Positive
	8	20.3	23.5	25.9	Positive
	9	20.3	23.9	25.8	Positive
	10	21.5	24.9	26.1	Positive
	11	20.2	23.8	26.3	Positive
	12	20.7	23.9	26.4	Positive
	13	20.7	23.9	26.1	Positive
	14	20.6	24	26.2	Positive
	15	20.7	24	26.2	Positive
	16	20.5	23.6	25.9	Positive
	17	19.8	23.2	25.8	Positive
	18	20.2	23.8	25.8	Positive
	19	20	23.4	25.6	Positive
	20	20.3	23.3	25.9	Positive
	average	20.455	23.67	25.975
	std dev	0.357587	0.381272	0.24034
Concentration	Replicate	Ct Value			NOF Interpretation
		N1	E	RP
10x LoD	1	17.4	21.2	25.1	Positive
	2	17.8	21.3	25.1	Positive
	3	17.6	21.4	24.6	Positive
	4	17.3	21.2	24.5	Positive
	5	17.1	21	24.4	Positive
	6	17.5	21.5	24.2	Positive
	7	17.1	20.7	24.2	Positive
	8	17.5	20.6	24.1	Positive
	9	16.9	21	24.2	Positive
	10	17.4	21.2	24.3	Positive
	average	17.36	21.11	24.47
	std dev	0.267499	0.288483	0.3653
Concentration	Replicate	Ct Value			NOF Interpretation
		N1	E	RP
Negative	1	n.d.	n.d.	22	Negative
	2	n.d.	n.d.	19.3	Negative
	3	n.d.	n.d.	20.3	Negative
	4	n.d.	n.d.	20.2	Negative
	5	n.d.	n.d.	20.1	Negative
	6	n.d.	n.d.	19.8	Negative
	7	n.d.	n.d.	19.9	Negative
	8	n.d.	n.d.	20.3	Negative
	9	n.d.	n.d.	20.1	Negative
	10	n.d.	n.d.	19.5	Negative
	average	#DIV/0!	#DIV/0!	20.15
	std dev	#DIV/0!	#DIV/0!	0.730677
Table 16. Stability of 2x LoD samples at 25°C for 56 hours
Concentration	Replicate	Ct Value			NOF Interpretation
		N1	E	RP
2x LoD	1	24.2	24.5	24.3	Positive
	2	24.4	24.5	24.2	Positive
	3	23.4	23.8	24	Positive
	4	23.3	23.5	24.1	Positive
	5	23.5	24	24.1	Positive
	6	23.4	24	24	Positive
	7	23.4	23.6	24.3	Positive
	8	23.8	24.1	24.2	Positive
	9	23	23.5	24.1	Positive
	10	23.2	23.4	24.3	Positive
	11	22.6	23.3	23.9	Positive
	12	22.8	23.2	24.2	Positive
	13	22.3	23.2	24.4	Positive
	14	22.2	23.2	24.4	Positive
	15	22.5	23.4	24.2	Positive
	16	22.7	23.6	24.2	Positive
	17	22.1	23	23.8	Positive
	18	21.9	23	23.9	Positive
	19	21.9	22.8	23.7	Positive
	20	22.5	22.8	23.8	Positive
	average	22.955	23.52	24.105
	std dev	0.725821	0.501157	0.203845
Table 17. Stability of 10x LoD samples at 25°C for 56 hours
Concentration	Replicate	Ct Value			NOF Interpretation
		N1	E	RP
10x LoD	1	19.7	21	23.3	Positive
	2	20.1	20.6	23.5	Positive
	3	19.6	20.7	23.3	Positive
	4	19.7	20.5	23.3	Positive
	5	19.5	20.5	22.6	Positive
	6	19.5	20.6	23.3	Positive
	7	19.6	20.5	23	Positive
	8	20.1	20.6	23	Positive
	9	19.6	20.9	23.2	Positive
	10	19.8	20.8	23.3	Positive
	average	19.72	20.67	23.18
	std dev	0.220101	0.176698	0.252982
Table 18. Stability of negative samples at 25°C for 56 hours
Concentration	Replicate	Ct Value			NOF Interpretation
		N1	E	RP
Negative	1	n.d.	n.d.	22.4	Negative
	2	n.d.	n.d.	20.6	Negative
	3	n.d.	n.d.	20.5	Negative
	4	n.d.	n.d.	20.5	Negative
	5	n.d.	n.d.	20.3	Negative
	6	n.d.	n.d.	21.4	Negative
	7	n.d.	n.d.	19.8	Negative
	8	n.d.	n.d.	23	Negative
	9	n.d.	n.d.	21.4	Negative
	10	n.d.	n.d.	19.1	Negative
	average	#DIV/0!	#DIV/0!	20.9
	std dev	#DIV/0!	#DIV/0!	1.17284
Table 20. Stability of 2x LoD samples at 4°C for 56 hours
Concentration	Replicate	Ct Value			NOF Interpretation
		N1	E	RP
2x LoD	1	24.9	25	25	Positive
	2	24.7	24.8	24.6	Positive
	3	23.6	24.2	24.6	Positive
	4	23.6	24.1	24.5	Positive
	5	23.7	24.5	24.5	Positive
	6	23.8	24.4	24.6	Positive
	7	24	24.5	24.4	Positive
	8	24.1	24.4	24.5	Positive
	9	23.4	24	24.7	Positive
	10	23.5	24	24.4	Positive
	11	23.2	24.1	24.5	Positive
	12	23.4	24	24.5	Positive
	13	22.9	23.8	25.1	Positive
	14	23.2	23.9	25.1	Positive
	15	23.1	24	24.7	Positive
	16	23.2	24	24.7	Positive
	17	22.7	23.3	24.3	Positive
	18	22.6	23.4	24.3	Positive
	19	22.3	23.2	24.3	Positive
	20	22.4	23.1	24.1	Positive
	average	23.415	24.035	24.57
	std dev	0.685393	0.505001	0.263778
Table 21. Stability of 10x LoD samples at 4°C for 56 hours
Concentration	Replicate	Ct Value			NOF Interpretation
		N1	E	RP
10x LoD	1	20.3	20.9	23.9	Positive
	2	20.4	21	24	Positive
	3	20.5	21.2	23.9	Positive
	4	20.3	21.1	23.8	Positive
	5	20.1	21.2	23.3	Positive
	6	20.6	21.6	24.2	Positive
	7	20.4	20.8	24.1	Positive
	8	20.3	21.1	23.6	Positive
	9	20.4	21.1	24	Positive
	10	20.6	21.1	24	Positive
	average	20.39	21.11	23.88
	std dev	0.152388	0.213177	0.261619
Table 22. Stability of negative samples at 25°C for 56 hours
Concentration	Replicate	Ct Value			NOF Interpretation
		N1	E	RP
Negative	1	n.d.	n.d.	23.4	Negative
	2	n.d.	n.d.	21.5	Negative
	3	n.d.	n.d.	20.1	Negative
	4	n.d.	n.d.	25.7	Negative
	5	n.d.	n.d.	22.6	Negative
	6	n.d.	n.d.	23.2	Negative
	7	n.d.	n.d.	24.3	Negative
	8	n.d.	n.d.	24.1	Negative
	9	n.d.	n.d.	21.1	Negative
	10	n.d.	n.d.	21.8	Negative
	average	#DIV/0!	#DIV/0!	22.78
	std dev	#DIV/0!	#DIV/0!	1.69234

## Sheet: Table 7
Test Number	SARS-CoV-2 Test Date	SARS-CoV-2 Positive	N1	N2	SARS-CoV-2 Test Date	SARS-CoV-2 Positive (Testing from an results)
876	2020-11-04	1	13.32	14.21	2020-11-05	1
768	2020-10-05	1	14.13	15.12	2020-10-08	1
849	2020-10-29	1	14.24	15.82	2020-11-02	1
984	2020-11-09	1	15.31	16.95	2020-11-12	0
981	2020-11-09	1	16.14	16.81	2020-11-12	1
698	2020-09-20	1	16.24	16.87	2020-09-15	1
783	2020-10-05	1	19.07	22.76	2020-10-10	1
695	2020-09-09	1	23.1	24.42	2020-09-15	1
738	2020-09-23	1	24.49	25.86	2020-09-29	1
715	2020-09-28	1	25.7	27.35	2020-10-01	1
718	2020-09-28	1	27.17	29.01	2020-10-01	0
745	2020-09-23	1	29.11	30.01	2020-09-29	1
723	2020-09-23	1	30.43	33.71	2020-09-29	0
785	2020-10-05	1	30.61	33.51	2020-10-10	0
729	2020-09-23	1	31.18	32.79	2020-09-29	0
693	2020-09-09	1	31.38	33.43	2020-09-14	1
817	2020-10-19	1	31.43	34.47	2020-10-22	0
694	2020-09-09	1	32.64	33.88	2020-09-14	0
788	2020-10-14	0	33.19	>40	2020-10-20	0
982	2020-11-09	0	33.6	>40	2020-11-12	0
874	2020-11-04	0	34.31	>40	2020-11-09	0
828	2020-10-28	1	34.6	38.18	2020-11-03	0
846	2020-11-02	1	34.61	38.82	2020-11-05	0
Secondary Testing of Field Samples for SARS-CoV-2
Category	Initially Tested Positive (PSCS-CoV2)	Re-tested Positive	Percent agreement
N1<30	12	10	83.3333
N1>30	8	1	12.5
Category	Initially Tested Negative (PSCS-CoV2)	Re-Tested Negative	Percent agreement
N1>30	3	3	100

## Sheet: Table 8 and Summary Statistics
		Total	COVID +	% positive	RP mean (SD)
	September	150	16	10.6667	22.4 (1.7)
	October	81	10	12.3457	23.77 (2.1)
	November	75	6	8	22.6 (1.8)
	Total	306	32	10.4575
	Type of Pools	Positivity Rate (p)	Size of the Pools (k)	Total Number of Samples (s)	Number of Samples positive for sARS-COV-2	Total Number of Trials (number of pools + number of individual samples tested)	Number of Trials Saved by the Pooling Method		Number of Pools positive for SARS-COV-2	Number of Individual Samples Tested	Average CT of RP
	Pools A (Low-Risk for COVID-19)	0.083	4	48	4	24	24		3	12	20.9
	Pool B (High-Risk for COVID-19)	0.13	2	28	4	20	8		3	6	20.7

## Sheet: Table 8 Pooled Data of 4
	Test #	Test Date	general count	Diagnosis	RP	N1	N2	E	RP	N1	N2	E
Pool 1	101	2020-08-03	0		21.43	>40		>40
	102	2020-08-03	0
	103	2020-08-03	0
	104	2020-08-03	0
Pool 2	105	2020-08-03	0		20.61	36.93		37.95	18.49	>40		>40
	106	2020-08-03	0						24.24	>40		>40
	107	2020-08-03	0	1					23.21	36.34		>40
	108	2020-08-03	0						23.46	>40		>40
Pool 3	109	2020-08-03	0		20.67	>40		>40
	110	2020-08-03	0
	111	2020-08-03	0
	112	2020-08-03	0
Pool 4	113	2020-08-03	0		20.72	>40		>40
	114	2020-08-03	0
	115	2020-08-03	0
	116	2020-08-03	0
Pool 5	117	2020-08-03	0	1	21.09	15.6		16.01	23.3	14.09		14.38
	118	3030-08-02	0	1					25	21.89		21.97
	119	2020-08-03	0						22.59	>40		>40
	120	2020-08-03	0						20.39	>40		>40
Pool 6	121	2020-08-03	0		19.12	>40		>40
	122	2020-08-03	0
	123	2020-08-03	0
	124	2020-08-03	0
Pool 7	125	2020-08-03	0		21.5	>40		>40
	126	2020-08-03	0
	127	2020-08-03	0
	128	2020-08-03	0
Pool 8	130	2020-08-03	0		18.68	26.01		28.22	22.66	>40		>40
	129	2020-08-03	0	1					19.43	25.91		28.68
	131	2020-08-03	0						22.83	>40		>40
	132	2020-08-03	0						22.42	>40		>40
Pool 9	183	2020-08-14	0		23.03	>40		>40
	184	2020-08-14	0
	185	2020-08-14	0
	186	2020-08-14	0
Pool 10	187	2020-08-14	0		20.59	>40		>40
	188	2020-08-14	0
	189	2020-08-14	0
	190	2020-08-14	0
Pool 11	191	2020-08-14	0		21.32	>40		>40
	192	2020-08-14	0
	193	2020-08-14	0
	194	2020-08-14	0
Pool 12	195	2020-08-14	0		20.58	>40		>40
	196	2020-08-14	0
	197	2020-08-14	0
	198	2020-08-14	0

## Sheet: Table 8 Pooled Data of 2
	Test #	Test Date	general count	Diagnosis	RP	N1	N2	E	RP	N1	N2	E	RDRP
pool 1	199	2020-08-14	0		24.18	>40		>40
	200	2020-08-14	0
pool 2	473	2020-08-25	0		21.25	>40		>40
	474	2020-08-25	0
pool 3	477	2020-08-25	0	1	20.2	36.26		38.77	20.17	36.96		37.61
	478	2020-08-25	0	1					18.78	35.55		37.48
pool 4	479	2020-08-25	0		19.17	>40		>40
	480	2020-08-25	0
pool 5	481	2020-08-25	0		20.47	>40		>40
	482	2020-08-25	0
pool 6	483	2020-08-25	0		20.55	36.46		>40
	484	2020-08-25	0
pool 7	485	2020-08-25	0		20.71	>40		>40
	486	2020-08-25	0
pool 8	487	2020-08-25	0		19.5	>40		>40
	488	2020-08-25	0
pool 9	489	2020-08-25	0		21.54	37.09		38.37	20.46	>40		38.37
	490	2020-08-25	0	1					21	30.12		31.56
pool 10	491	2020-08-25	0		19.37	>40		>40
	492	2020-08-25	0
pool 11	493	2020-08-25	0		21.21	35		>40
	495	2020-08-25	0
pool 12	496	2020-08-25	0		21.98	>40		39.61
	498	2020-08-25	0
pool 13	499	2020-08-25	0		20.08	37.27		37.01	20.73	>40		38.22
	500	2020-08-25	0	1					18.37	34.05		35.83
pool 14	501	2020-08-25	0		19.34	>40		38.2
	503	2020-08-25	0

## Sheet: Supplemental Figure 2
Date the test was run	Time (Day) of collection	N1				N2				RP
2020-04-03	0	18.54				18.4				20.56
2020-04-06	3	17.23				19.75				26.23
2020-04-07	4	17.17				19.94				33.73
2020-04-09	5	33.17				32.93				24.4
2020-04-09	6	30.04				33.48				24.43
2020-04-10	7	28.17				35.5				22.41
2020-04-14	8	35.58				40.14				21.16
2020-04-14	9	37.05				41.91				23.24
2020-04-14	10	36.26				43.58				22.7
2020-04-14	11	36.66				42.14				23.2

## Sheet: Sept 2020
Test #	Date Sample Collected	Positive	RP	N1	N2
581	2020-08-31	1	24.01	35.11	37.31
610	2020-08-31		20.18	37.19	>40
612	2020-08-31		21.73	37.12	>40
613	2020-08-31		20.99	36.26	>40
614	2020-08-31		20.33	>40	>40
618	2020-09-01		23.89	35.95	>40
619	2020-09-01		20.06	>40	>40
620	2020-09-01		22.41	36	>40
621	2020-09-01		20.74	36.81	>40
622	2020-09-01		20.35	>40	>40
623	2020-09-01		23	>40	>40
624	2020-09-01		21.71	>40	>40
625	2020-08-31		20.24	>40	>40
626	2020-08-31		26.46	>40	>40
627	2020-08-31		22.91	>40	>40
628	2020-09-01		19.6	37.16	>40
629	2020-09-01		20.36	>40	>40
630	2020-09-01		21.37	36.97	>40
631	2020-09-01		22.17	36.7	>40
632	2020-09-01		22.32	>40	>40
633	2020-09-02		23.57	>40	>40
639	2020-09-02		20.01	>40	>40
640	2020-09-02	1	22.96	24.26	27.34
641	2020-09-02		21.31	>40	>40
643	2020-09-02		21.29	>40	>40
645	2020-09-02		20.05	>40	>40
648	2020-09-02		20.16	>40	>40
649	2020-09-02		21.51	>40	>40
650	2020-09-02		22.1	>40	>40
651	2020-09-02		21.71	>40	>40
654	2020-09-02		22.63	>40	>40
659	2020-09-02		21.01	>40	>40
660	2020-09-02		23.77	>40	>40
662	2020-09-02		26.37	>40	>40
663	2020-09-02		30.41	>40	>40
664	2020-09-02		21.73	>40	>40
665	2020-09-02		23.36	>40	>40
667	2020-09-02		22.28	>40	>40
668	2020-09-02		24.27	>40	>40
669	2020-09-02		21.53	>40	>40
670	2020-09-02		22.12	>40	>40
671	2020-09-02		20.94	>40	>40
672	2020-09-02		19.09	>40	>40
673	2020-09-02		23.51	>40	>40
615	2020-09-02		20.65	>40	>40
616	2020-09-02		24	>40	>40
617	2020-09-08		24.46	37.5	>40
634	2020-09-08		21.06	>40	>40
635	2020-09-08		20.19	>40	>40
636	2020-09-08		22.32	>40	>40
637	2020-09-08		21.26	>40	>40
638	2020-09-08		21.24	>40	>40
642	2020-09-08		20.83	36.29	>40
644	2020-09-08		20.81	>40	>40
646	2020-09-08		23.19	>40	>40
647	2020-09-08		23.45	>40	>40
652	2020-09-08		21.62	>40	>40
653	2020-09-08		22.18	>40	>40
655	2020-09-08		22.55	>40	>40
656	2020-09-08		19.47	>40	>40
657	2020-09-08		23.07	>40	>40
661	2020-09-08		21.47	>40	>40
666	2020-09-08		19.5	>40	>40
676	2020-09-08		24.2	>40	>40
677	2020-09-08		23.67	>40	>40
678	2020-09-08		23.99	>40	>40
679	2020-09-08		20.64	>40	>40
680	2020-09-08		21.43	>40	>40
681	2020-09-08		23.1	>40	>40
682	2020-09-08		21.09	>40	>40
683	2020-09-08		21.92	>40	>40
684	2020-09-08		22.19	>40	>40
686	2020-09-09		22.16	>40	>40
687	2020-09-09		21.21	>40	>40
688	2020-09-09		24.09	>40	>40
689	2020-09-09		22.09	>40	>40
690	2020-09-09		24.24	>40	>40
691	2020-09-09		22.77	37.45	>40
692	2020-09-09		21.23	37.61	>40
693	2020-09-09	1	22.18	31.38	33.43
694	2020-09-09	1	23.28	32.64	33.88
695	2020-09-09	1	22.79	23.1	24.42
696	2020-09-09	1	21.81	34.65	35.73
698	2020-09-10	1	25.19	16.24	16.87
674	2020-09-14		21.74	>40	>40
675	2020-09-14		23	>40	>40
685	2020-09-14		23.48	39.72	>40
697	2020-09-14		23.34	>40	>40
699	2020-09-14		24.68	>40	>40
700	2020-09-14		22.71	37.03	>40
701	2020-09-14		22.14	>40	>40
702	2020-09-14		23.56	>40	>40
703	2020-09-14		19.88	>40	>40
704	2020-09-14		20.59	>40	>40
705	2020-09-14		21.42	>40	>40
707	2020-09-16		22.81	>40	>40
708	2020-09-16		23.23	>40	>40
709	2020-09-16		24.35	>40	>40
710	2020-09-16		24.28	>40	>40
711	2020-09-16		19.9	>40	>40
712	2020-09-16		24.09	>40	>40
713	2020-09-16		22.35	>40	>40
714	2020-09-22		19.92	>40	>40
721	2020-09-23		21.43	>40	>40
722	2020-09-23		24.9	36.94	>40
723	2020-09-23	1	21.33	30.43	33.71
724	2020-09-23		19.06	>40	>40
725	2020-09-23		21.13	36.89	38.25
726	2020-09-23		20.8	37.01	>40
727	2020-09-23		20.68	>40	>40
728	2020-09-23		24.24	>40	>40
729	2020-09-23	1	21.29	31.18	32.79
730	2020-09-23		20.25	36.86	>40
731	2020-09-23	1	22.35	37.28	38.28
732	2020-09-23		21.98	>40	39.62
733	2020-09-23		19.3	>40	39.33
734	2020-09-23		24.08	>40	>40
735	2020-09-23			>40	>40
736	2020-09-23		24.3	>40	>40
737	2020-09-23		23.95	>40	>40
738	2020-09-23	1	23.28	24.49	25.86
745	2020-09-23	1	22.89	29.11	30.01
746	2020-09-23		22.43	>40	>40
747	2020-09-23	1	22.68	24.17	25.72
748	2020-09-23		23.09	>40	>40
749	2020-09-23		21.03	>40	>40
750	2020-09-23		21.94	>40	>40
706	2020-09-28		22.75	>40	>40
715	2020-09-28	1	24.25	25.7	27.35
716	2020-09-28		24.16	>40	>40
717	2020-09-28		23.85	>40	>40
718	2020-09-28	1	24.78	27.17	29.01
719	2020-09-28		23.12	>40	>40
720	2020-09-28		25.09	>40	>40
739	2020-09-28		24.48	>40	>40
740	2020-09-28		24.04	>40	>40
741	2020-09-28	1	23.35	33.25	35.52
742	2020-09-28		24.32	38.18	>40
743	2020-09-28		23.54	>40	>40
744	2020-09-28		23.38	>40	>40
757	2020-09-28		22.16	>40	>40
758	2020-09-28		24.81	>40	>40
759	2020-09-28		23.42	>40	>40
760	2020-09-28		24.95	>40	>40
761	2020-09-28		22.8	>40	>40
762	2020-09-28		21.35	>40	>40
763	2020-09-28		23.41	>40	>40
764	2020-09-28		22.57	>40	>40
765	2020-09-28		20.29	>40	>40
770	2020-09-28		20.47	>40	>40

[truncated: 2 more sheets: Oct 2020, Nov 2020]
